# Supplementary material for: Design and baseline description of an observational population-based cohort study on COVID-19 vaccine effectiveness in the Netherlands - The VAccine Study COvid-19 (VASCO)
Source: Research Square preprint supplement (doi:10.21203/rs.3.rs-1645696/v1), 2022-05-19

**Additional file 1 - Design and baseline description of an observational population-based cohort study into COVID-19 vaccine effectiveness in the Netherlands - The VAccine Study COvid-19 (VASCO)**

**Figure S1**. Timeline examples participants


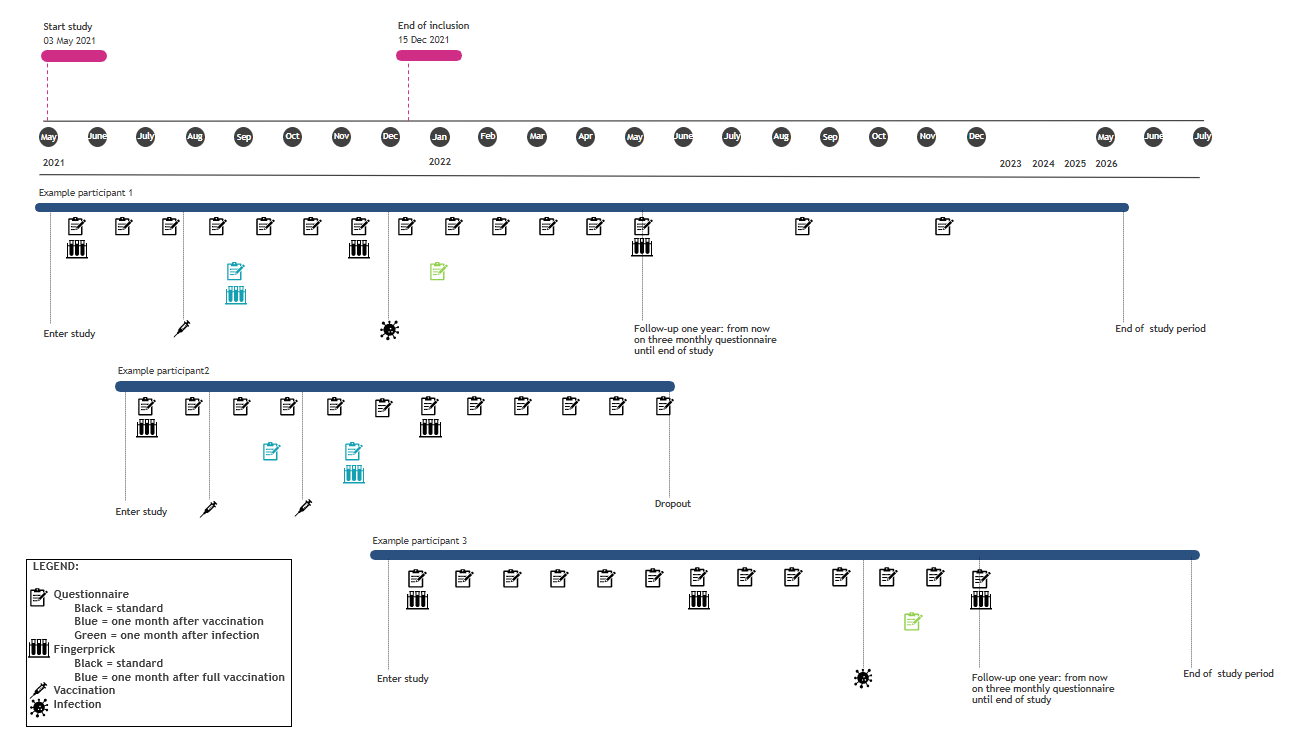


**Figure S2**. Number of inclusions over time with recruitment actions


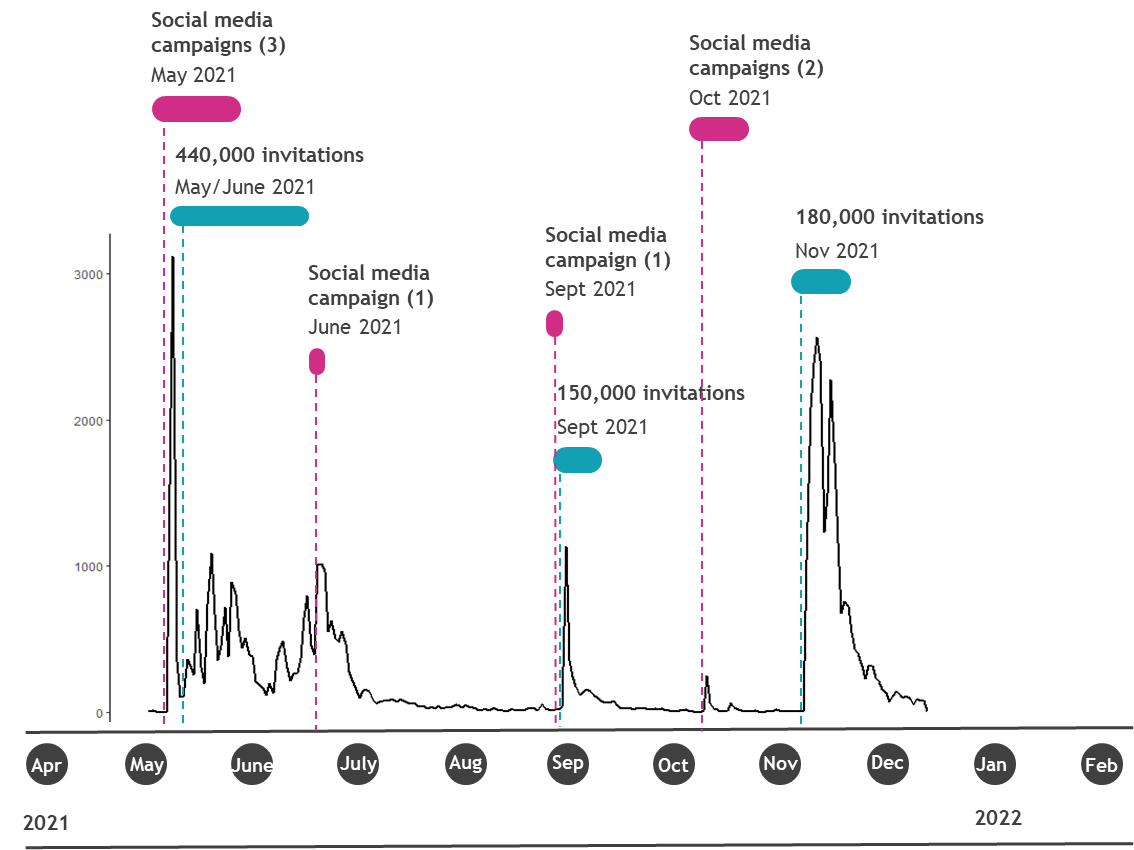

Supplement: Supplementary file 1 [file f66d7a7d6f513995ca388942.docx]
